# Supplementary material for: Printable mesoscopic perovskite solar cells with performance tuning via trifluoroacetamide
Source: Royal Society of Chemistry journal article supplement (doi:10.1039/d4se01801j), 2025-01-01
Supplement: d4se01801j1.xlsx [file d4se01801j1.xlsx]

## Sheet: Sheet1
J-V: Control		J-V: With TFAA				EQE: Control			EQE: With TFAA
Voc(V)	Jsc(mA/cm2)	Voc(V)	Jsc(mA/cm2)			Lambda(nm)	EQE(%)	Integrated Current (mA cm-2)	Lambda(nm)	EQE(%)	Integrated Current (mA cm-2)
1.2	-95.3319	1.2	-69.7522			300	15.98	3.94589e-05	300	14.77	3.64711e-05
1.18	-81.9418	1.18	-63.9175			310	34.32	0.00441	310	31.93	0.0041
1.16	-77.9348	1.16	-55.0974			320	52.98	0.03248	320	49.56	0.03036
1.14	-70.7717	1.14	-45.7717			330	65.44	0.11458	330	61.93	0.10806
1.12	-62.6051	1.12	-36.6445			340	73.28	0.21542	340	70.33	0.20484
1.1	-53.8321	1.1	-27.9766			350	77.69	0.33122	350	75.52	0.3174
1.08	-44.9585	1.08	-19.8535			360	79.44	0.46919	360	78.05	0.45296
1.06	-36.2354	1.06	-12.4201			370	80.34	0.65022	370	79.69	0.63253
1.04	-27.7827	1.04	-5.78525			380	82.25	0.82688	380	81.78	0.80817
1.02	-19.7456	1.02	-0.16317			390	83.27	1.03564	390	83.28	1.01696
1	-12.2496	1	5.09173			400	85.33	1.34234	400	85.28	1.32348
0.98	-5.14556	0.98	9.44473			410	85.78	1.63976	410	85.85	1.62114
0.96	0.96248	0.96	12.8886			420	86.9	1.9704	420	87.09	1.95251
0.94	6.14899	0.94	15.6903			430	87.21	2.23494	430	87.65	2.21838
0.92	10.3729	0.92	17.9029			440	87.38	2.65354	440	87.88	2.63938
0.9	13.8989	0.9	19.54			450	87.62	3.14949	450	88.54	3.14053
0.88	16.5656	0.88	20.7064			460	88.22	3.64998	460	88.99	3.64539
0.86	18.5713	0.86	21.591			470	89.29	4.16031	470	89.86	4.15897
0.84	20.0142	0.84	22.2315			480	90.11	4.72479	480	90.95	4.72872
0.82	21.0629	0.82	22.6052			490	90.17	5.30295	490	91.17	5.3133
0.8	21.7711	0.8	22.8052			500	90.41	5.8663	500	91.67	5.8845
0.78	22.2573	0.78	22.967			510	90.63	6.44343	510	92.08	6.47086
0.76	22.5456	0.76	23.0848			520	89.88	7.01778	520	91.57	7.056
0.74	22.6763	0.74	23.1709			530	89.74	7.61031	530	91.69	7.66141
0.72	22.739	0.72	23.1588			540	89.77	8.18994	540	91.99	8.25538
0.7	22.7932	0.7	23.1678			550	89.54	8.80159	550	91.96	8.88356
0.68	22.8402	0.68	23.1991			560	89.36	9.39652	560	92.11	9.4968
0.66	22.9076	0.66	23.257			570	89.32	10.0049	570	92.45	10.1265
0.64	22.95	0.64	23.2038			580	88.61	10.6275	580	92.12	10.7738
0.62	22.9259	0.62	23.2325			590	88.19	11.2028	590	91.96	11.3737
0.6	22.9197	0.6	23.2547			600	86.66	11.8216	600	90.81	12.022
0.58	22.9081	0.58	23.2499			610	85.34	12.4382	610	89.72	12.6703
0.56	22.9396	0.56	23.2296			620	84.17	13.0585	620	88.77	13.3246
0.54	22.9561	0.54	23.2695			630	83	13.6458	630	87.53	13.9439
0.52	22.9544	0.52	23.2957			640	81.82	14.2514	640	86.3	14.5827
0.5	22.963	0.5	23.3197			650	81.02	14.8288	650	85.43	15.1915
0.48	22.9608	0.48	23.3458			660	79.55	15.4214	660	83.79	15.8156
0.46	22.9589	0.46	23.3553			670	78.57	16.0241	670	82.81	16.4509
0.44	22.9564	0.44	23.3699			680	77.76	16.6198	680	81.77	17.0774
0.42	22.9385	0.42	23.3871			690	76.89	17.1257	690	80.77	17.6087
0.4	22.8845	0.4	23.4029			700	76.15	17.677	700	79.95	18.1875
0.38	22.943	0.38	23.4413			710	75.06	18.2433	710	78.71	18.7814
0.36	22.9614	0.36	23.4378			720	74.68	18.6707	720	78.1	19.2283
0.34	22.9547	0.34	23.4105			730	73.58	19.1596	730	76.73	19.7382
0.32	22.9326	0.32	23.4158			740	72.68	19.6886	740	75.69	20.2891
0.3	22.9124	0.3	23.4453			750	71.4	20.2216	750	74.2	20.843
0.28	22.8995	0.28	23.4617			760	69.48	20.3349	760	71.7	20.9599
0.26	22.9124	0.26	23.4909			770	67	20.8179	770	68.56	21.4542
0.24	22.9232	0.24	23.5059			780	58.56	21.2466	780	58.45	21.8821
0.22	22.9329	0.22	23.4706			790	42.8	21.5441	790	39.65	22.1577
0.2	22.9404	0.2	23.448			800	25.85	21.723	800	21.02	22.3032
0.18	22.969	0.18	23.4425			810	12.96	21.8124	810	9.11	22.366
0.16	22.9394	0.16	23.467			820	3.76	21.8339	820	0	22.366
0.14	22.912	0.14	23.5094			830	1.68	21.8442	830	1.1	22.3727
0.12	22.8856	0.12	23.4796			840	0	21.8442	840	0	22.3727
0.1	22.9054	0.1	23.4664			850	0	21.8442	850	0	22.3727
0.08	22.9341	0.08	23.4655
0.06	22.9435	0.06	23.4602
0.04	22.9626	0.04	23.4313
0.02	22.9552	0.02	23.4179
0	22.936	0	23.4311
-0.02	22.9192	-0.02	23.449
-0.04	22.9161	-0.04	23.423
-0.06	22.9541	-0.06	23.4235
-0.08	22.9698	-0.08	23.424
-0.1	22.9696	-0.1	23.4194
-0.12	22.9556	-0.12	23.4382
-0.14	22.9376	-0.14	23.4496
-0.16	22.9236	-0.16	23.4457
-0.18	22.9196	-0.18	23.4534
-0.2	22.9113	-0.2	23.4833
